# Supplementary material for: Effects of enriched branched-chain amino acid supplementation on sarcopenia
Source: publisher site journal article supplement (doi:10.18632/aging.103576), 2020-07-26
Supplement: Supplementary file [file aging-v12i14-103576-supplementary-material-SD1.pdf]

SUPPLEMENTARY FIGURE

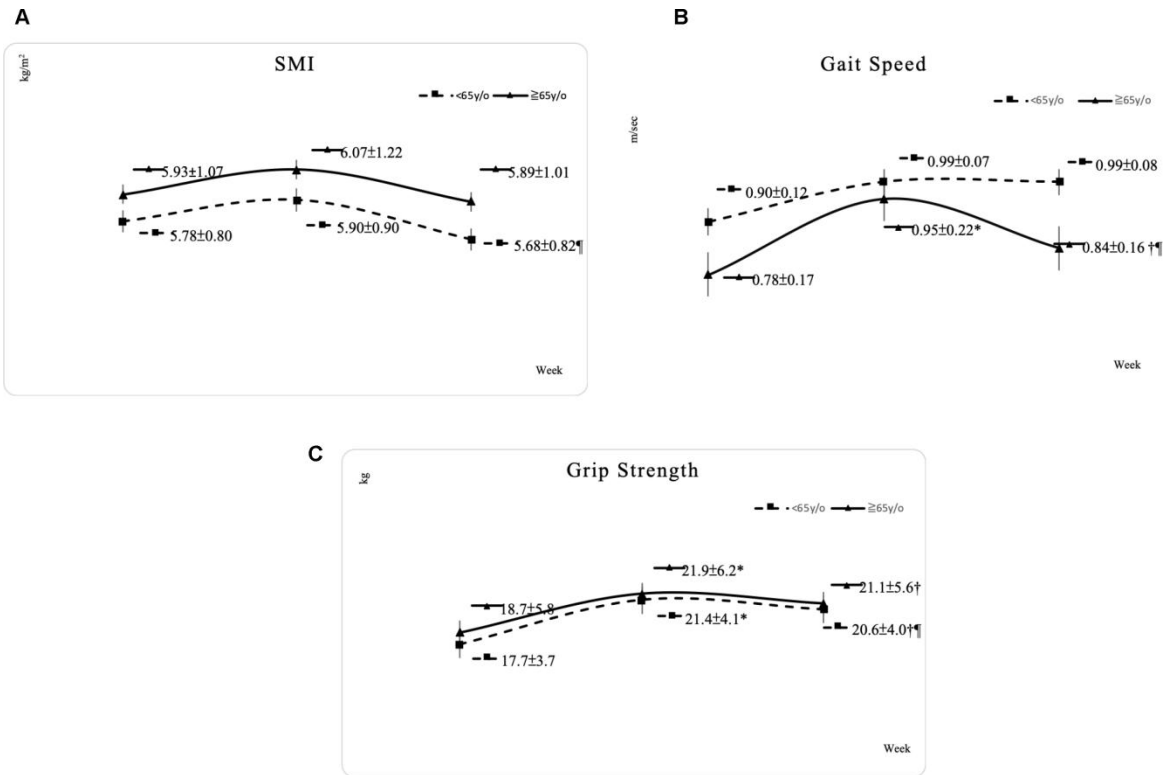

**Supplementary Figure 1. Mean ( $\pm$  SD) change from baseline, 5-weeks enriched BCAA intervention period to the 12-week withdrawal period by < 65y/o (n=12, 1 M/11 F) and  $\geq$  65y/o (n=14, 4 M/10 F) subgroup. (A) skeletal muscle mass index (SMI). (B) gait speed. (C) grip strength. Group differences were analyzed using Non-parametric Friedman & Wilcoxon Signed Rank test. Comparisons between baseline and week 5: \*  $p < 0.01$ . Comparisons between baseline and week 17: †  $p < 0.05$ . Comparisons between week 5 and week 17: ¶  $p < 0.05$ .**
